# Supplementary material for: Exploring glycosyl sulphates as donors for chemical glycosylation
Source: Royal Society of Chemistry journal article supplement (doi:10.1039/d1ob00603g), 2021-01-01

## Supporting Information

### Exploring Glycosyl Sulphates as Donors for Chemical Glycosylation

Daniela Imperio,\* Federica Campo and Luigi Panza

*Dipartimento di Scienze del Farmaco, Università del Piemonte Orientale, L. go Donegani 2, 28100, Novara, Italy*

*E-mail: daniela.imperio@uniupo.it*

#### Contents:

|                                                                                |            |
|--------------------------------------------------------------------------------|------------|
| <b>Table S1</b> Additional glycosylation entries with sulphate donor <b>2a</b> | <b>S2</b>  |
| <b>Table S2</b> Glycosylation entries with sulphate donor <b>2c</b>            | <b>S4</b>  |
| <b>Fig. S1</b> <sup>1</sup> H NMR spectrum of <b>2a</b> in CDCl <sub>3</sub>   | <b>S5</b>  |
| <b>Fig. S2</b> Apt NMR spectrum of <b>2a</b> in CDCl <sub>3</sub>              | <b>S5</b>  |
| <b>Fig. S3</b> Cosy NMR spectrum of <b>2a</b> in CDCl <sub>3</sub>             | <b>S6</b>  |
| <b>Fig. S4</b> HSQC NMR spectrum of <b>2a</b> in CDCl <sub>3</sub>             | <b>S6</b>  |
| <b>Fig. S5</b> <sup>1</sup> H NMR spectrum of <b>2b</b> in CDCl <sub>3</sub>   | <b>S7</b>  |
| <b>Fig. S6</b> Apt NMR spectrum of <b>2b</b> in CDCl <sub>3</sub>              | <b>S7</b>  |
| <b>Fig. S7</b> Cosy NMR spectrum of <b>2b</b> in CDCl <sub>3</sub>             | <b>S8</b>  |
| <b>Fig. S8</b> HSQC NMR spectrum of <b>2b</b> in CDCl <sub>3</sub>             | <b>S8</b>  |
| <b>Fig. S9</b> <sup>1</sup> H NMR spectrum of <b>2c</b> in CDCl <sub>3</sub>   | <b>S9</b>  |
| <b>Fig. S10</b> Apt NMR spectrum of <b>2c</b> in CDCl <sub>3</sub>             | <b>S9</b>  |
| <b>Fig. S11</b> Cosy NMR spectrum of <b>2c</b> in CDCl <sub>3</sub>            | <b>S10</b> |
| <b>Fig. S12</b> HSQC NMR spectrum of <b>2c</b> in CDCl <sub>3</sub>            | <b>S10</b> |
| <b>Fig. S13</b> <sup>1</sup> H NMR spectrum of <b>4c</b> in CDCl <sub>3</sub>  | <b>S11</b> |
| <b>Fig. S14</b> <sup>13</sup> C NMR spectrum of <b>4c</b> in CDCl <sub>3</sub> | <b>S11</b> |

#### Proton spectra of known compounds

|                                                                                |            |
|--------------------------------------------------------------------------------|------------|
| <b>Fig. S15</b> <sup>1</sup> H NMR spectrum of <b>4a</b> in CDCl <sub>3</sub>  | <b>S12</b> |
| <b>Fig. S16</b> <sup>1</sup> H NMR spectrum of <b>6a</b> in CDCl <sub>3</sub>  | <b>S12</b> |
| <b>Fig. S17</b> <sup>1</sup> H NMR spectrum of <b>8a</b> in CDCl <sub>3</sub>  | <b>S13</b> |
| <b>Fig. S18</b> <sup>1</sup> H NMR spectrum of <b>10a</b> in CDCl <sub>3</sub> | <b>S13</b> |
| <b>Fig. S19</b> <sup>1</sup> H NMR spectrum of <b>4b</b> in CDCl <sub>3</sub>  | <b>S14</b> |
| <b>Fig. S20</b> <sup>1</sup> H NMR spectrum of <b>6b</b> in CDCl <sub>3</sub>  | <b>S14</b> |
| <b>Fig. S21</b> <sup>1</sup> H NMR spectrum of <b>8b</b> in CDCl <sub>3</sub>  | <b>S15</b> |
| <b>Fig. S22</b> <sup>1</sup> H NMR spectrum of <b>10b</b> in CDCl <sub>3</sub> | <b>S15</b> |

**Table S1** Additional glycosylation entries with sulphate donor **2a**

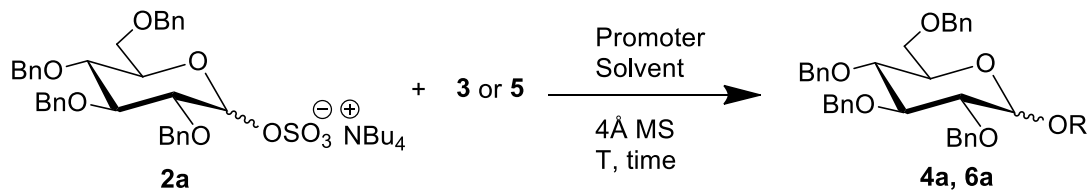

| Entry | Acceptor               | Promoter (equiv.)                                                                                                    | Solvent                                                   | T (°C), time          | Results(Yield, $\alpha/\beta$ ratio) |
|-------|------------------------|----------------------------------------------------------------------------------------------------------------------|-----------------------------------------------------------|-----------------------|--------------------------------------|
| 1     | 2-propanol<br><b>3</b> | Ca(OTf) <sub>2</sub> (1.7)                                                                                           | CH <sub>3</sub> CN                                        | r.t., 72 h            | <br><b>4a</b> (90% TLC)              |
| 2     | 2-propanol<br><b>3</b> | Yb(OTf) <sub>3</sub> (1.1)                                                                                           | CH <sub>2</sub> Cl <sub>2</sub> :Et <sub>2</sub> O<br>1:2 | 0°C, 1 h              | <br><b>4a</b> (90% TLC, 3:7)         |
| 3     | 2-propanol<br><b>3</b> | Ba(OTf) <sub>2</sub> (1.5)                                                                                           | Et <sub>2</sub> O                                         | r.t., 24 h            | no reaction                          |
| 4     | 2-propanol<br><b>3</b> | BaO (3), TMSOTf<br>(2.5)                                                                                             | CH <sub>2</sub> Cl <sub>2</sub> :Et <sub>2</sub> O<br>1:2 | 0°C, 45 min           | <br><b>4a</b> (90% TLC, 7:3)         |
| 5     | 2-propanol<br><b>3</b> | BaO (3), TMSOTf<br>(0.2+0.8 after 24 h)                                                                              | CH <sub>3</sub> CN                                        | 0° C to r.t.,<br>48 h | <br><b>4a</b> (25% TLC)              |
| 6     | 2-propanol<br><b>3</b> | BaO (3), TMSOTf<br>(1+0.5 after 24 h +<br>0.5 after 28 h)                                                            | CH <sub>3</sub> CN                                        | 0° C to r.t.,<br>48 h | <br><b>4a</b> (40% TLC)              |
| 7     | 2-propanol<br><b>3</b> | BaO (3), TMSOTf<br>(2+0.5 after 24 h)<br>(Slow reaction until<br>the addition of the<br>second portion of<br>TMSOTf) | CH <sub>3</sub> CN                                        | 0° C to r.t.,<br>25 h | <br><b>4a</b> (95% TLC)              |
| 8     | <br><b>5</b>           | CaO (3)                                                                                                              | THF                                                       | 50°C, 48 h            | no reaction                          |

|    |                                                                                               |                            |                                            |                             |                                                                                                                                    |
|----|-----------------------------------------------------------------------------------------------|----------------------------|--------------------------------------------|-----------------------------|------------------------------------------------------------------------------------------------------------------------------------|
| 9  | 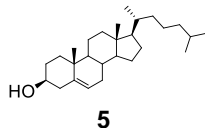<br><b>5</b> | CaCl <sub>2</sub> (6)      | THF                                        | r. t., 2 h                  | <br><b>threhaloses<sup>[a]</sup> (10%, TLC)</b> |
| 10 | <br><b>5</b> | Ca(OTf) <sub>2</sub> (1.2) | THF:CH <sub>2</sub> Cl <sub>2</sub><br>1:4 | r. t., 48 h                 | <br><b>6a (27% isolated; 50:50)</b>             |
| 11 | <br><b>5</b> | Ca(OTf) <sub>2</sub> (2)   | CH <sub>3</sub> CN                         | rfx, 4 h                    | <br><b>6a (65% isolated; 44:56)</b>             |
| 12 | <br><b>5</b> | Ca(OTf) <sub>2</sub> (2)   | Et <sub>2</sub> O                          | r. t., 24 h                 | <b>no reaction</b>                                                                                                                 |
| 13 | <br><b>5</b> | Ca(OTf) <sub>2</sub> (2)   | THF                                        | r. t., 2h<br>then 90°C, 26h | <br><b>6a (30% TLC)</b>                         |

[a] The formation of trehaloses can be due to the partial hydrolysis of the donor by adventitious water followed by the glycosylation of the anomeric hydroxyl group. In the previous paper the easy formation of trehaloses was already observed, see L. Cipolla, L. Lay, F. Nicotra, L. Panza, G. Russo, *Tetrahedron Lett.* **1994**, *35*, 8669-8670.

**Table S2** Glycosylation entries with sulphate donor **2c**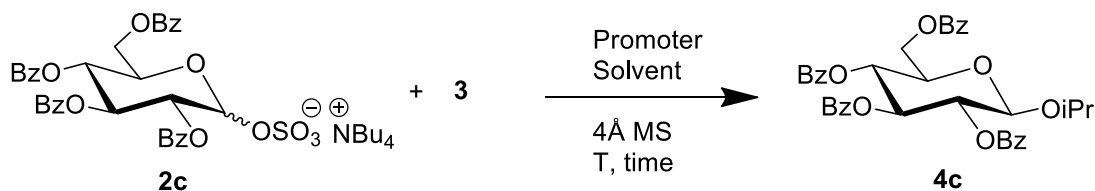

| Entry | Acceptor (equiv.)       | Promoter (equiv.)                                             | Solvent                         | T (°C), time       | Yield of 4c                     |
|-------|-------------------------|---------------------------------------------------------------|---------------------------------|--------------------|---------------------------------|
| 1     | 2-propanol <b>3</b> (2) | Yb(OTf) <sub>3</sub> (1.2)                                    | CH <sub>3</sub> CN              | r.t., 24 h         | 10% (TLC)                       |
| 2     | 2-propanol <b>3</b> (2) | Yb(OTf) <sub>3</sub> (4 additions of 1.5 eq each, every hour) | CH <sub>2</sub> Cl <sub>2</sub> | r.t., 24 h         | 53% (isolated)                  |
| 3     | 2-propanol <b>3</b> (2) | BaO (3), TMSOTf (2.5)                                         | CH <sub>2</sub> Cl <sub>2</sub> | 0°C to r.t. 7 h    | traces of a mixture of products |
| 4     | 2-propanol <b>3</b> (2) | BaO (3), TMSOTf (2.5)                                         | CH <sub>3</sub> CN              | 0° C to r.t., 72 h | 10% (TLC)                       |
| 5     | 2-propanol <b>3</b> (2) | TMSOTf (3)                                                    | CH <sub>2</sub> Cl <sub>2</sub> | 0°C to r.t. 24 h   | 10% (TLC)                       |
| 6     | 2-propanol <b>3</b> (2) | BF <sub>3</sub> -OEt <sub>2</sub> (3)                         | CH <sub>3</sub> CN              | 0° C to r.t., 24 h | no reaction                     |
| 7     | 2-propanol <b>3</b> (4) | Yb(OTf) <sub>3</sub> (1.5)                                    | CH <sub>2</sub> Cl <sub>2</sub> | reflux, 3 h        | 50% (TLC)                       |

**Isopropyl 2,3,4,6-tetra-*O*-benzoyl- $\beta$ -D-glucopyranoside (4c)** was obtained from donor **2c** and acceptor **3** as a white foam in the yield listed in table S2, entry 2.  $[\alpha]_D^{20} + 12.0$  (*c* 0.5, CH<sub>2</sub>Cl<sub>2</sub>); lit.<sup>1</sup> + 11.4 (CHCl<sub>3</sub>). <sup>1</sup>H NMR (400 MHz, CDCl<sub>3</sub>)  $\delta$  8.08 – 7.82 (8H, m), 7.62 – 7.26 (12H, m), 5.92 (1H, t, *J* = 9.7 Hz), 5.67 (1H, t, *J* = 9.7 Hz), 5.51 (1H, dd, *J* = 9.8, 7.9 Hz), 4.93 (1H, d, *J* = 7.9 Hz), 4.65 (1H, dd, *J* = 12.0, 3.3 Hz), 4.53 (1H, dd, *J* = 12.0, 5.6 Hz), 4.18 (1H, ddd, *J* = 9.3, 5.5, 3.4 Hz), 4.05 – 3.95 (1H, m), 1.25 (3H, d, *J* = 6.2 Hz), 1.10 (3H, d, *J* = 6.1 Hz). <sup>13</sup>C NMR (101 MHz, CDCl<sub>3</sub>)  $\delta$  166.17, 165.87, 165.26, 165.05, 133.41, 133.20, 133.13, 133.09, 129.85, 129.79, 129.73, 129.71, 129.66, 129.49, 128.90, 128.41, 128.35, 128.29, 100.13, 73.32, 73.04, 72.12, 70.04, 63.44, 23.24, 22.02. HRMS(ESI) *m/z* calcd for [C<sub>37</sub>H<sub>34</sub>O<sub>10</sub> + Na]<sup>+</sup>: 661.20497, found 661.20312.

<sup>1</sup> L. R. Schroeder and J. W. Green *J. Chem. Soc. C*, **1966**, 530-531

Fig. S1  $^1\text{H}$  NMR spectrum of **2a** in  $\text{CDCl}_3$  (400 MHz)

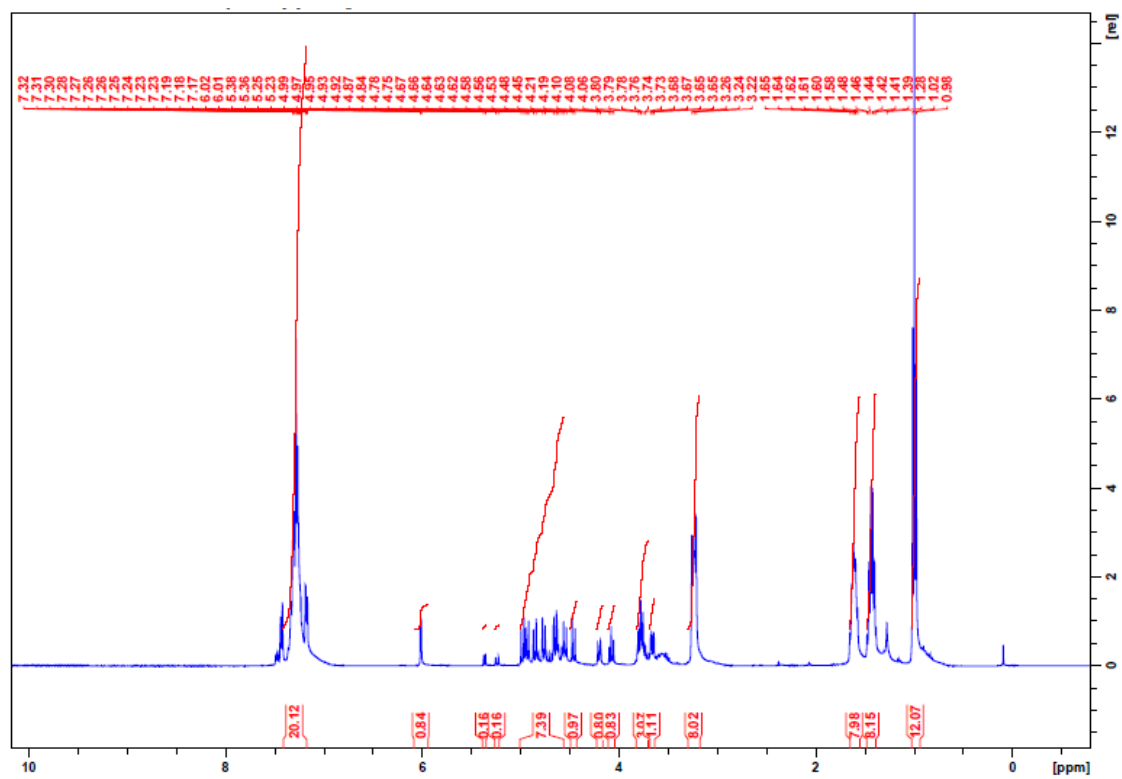

Fig. S2 Apt NMR spectrum of **2a** in  $\text{CDCl}_3$  (101 MHz)

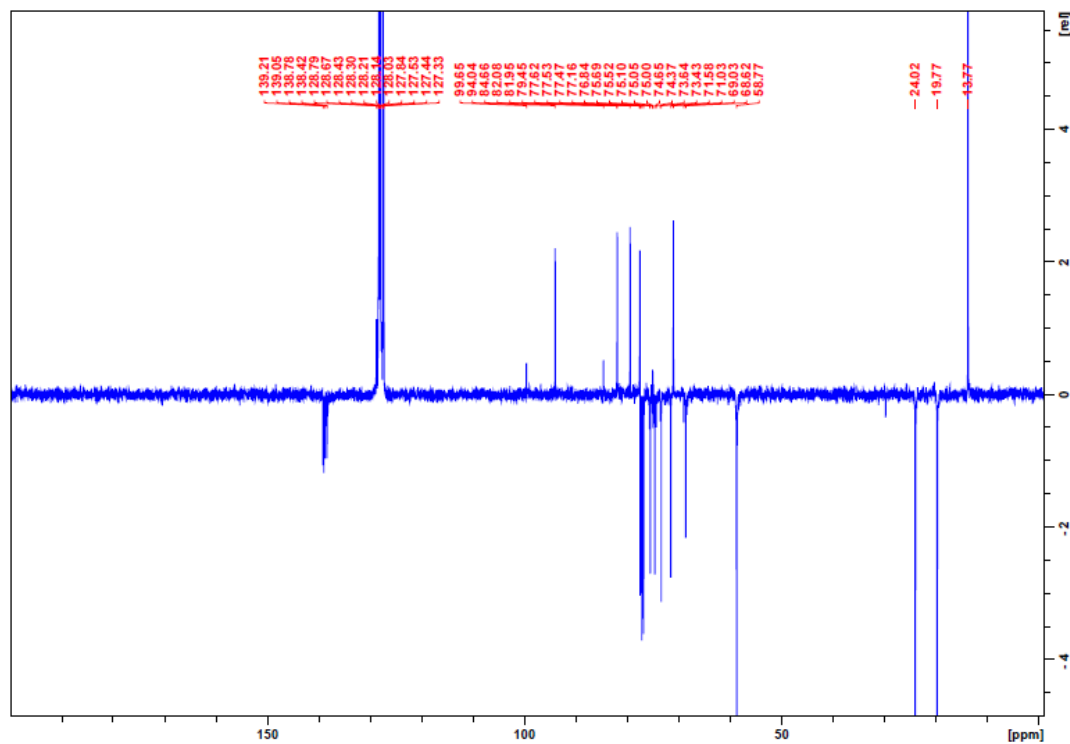

**Fig. S3** Cosy NMR spectrum of **2a** in CDCl<sub>3</sub> (400 MHz)

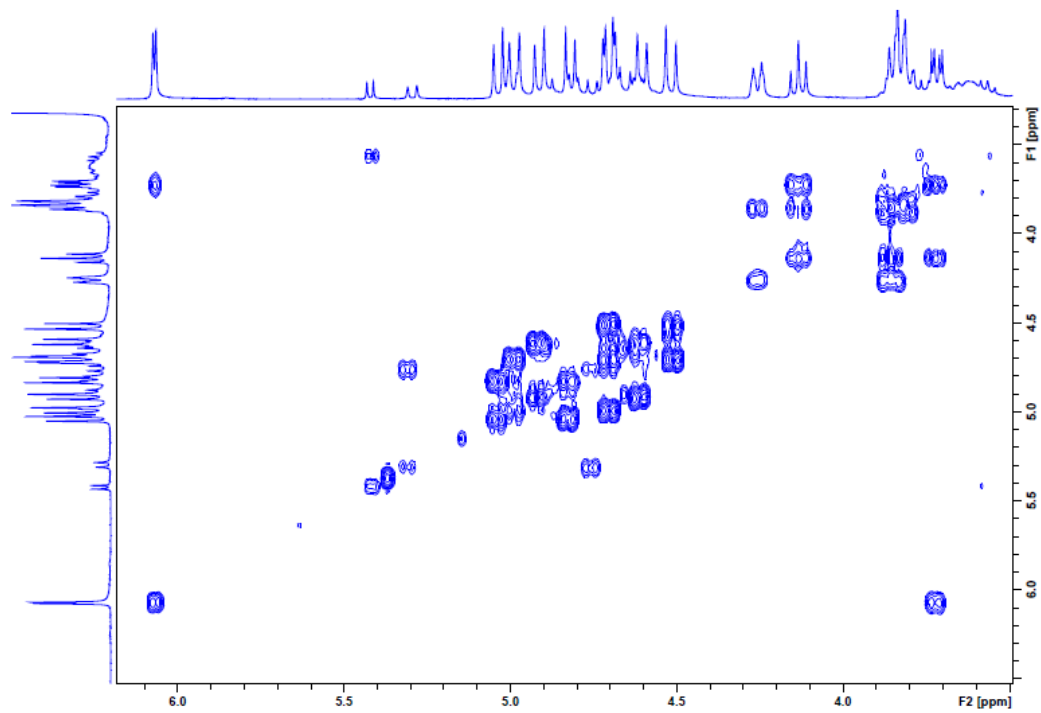

**Fig. S4** HSQC NMR spectrum of **2a** in CDCl<sub>3</sub>

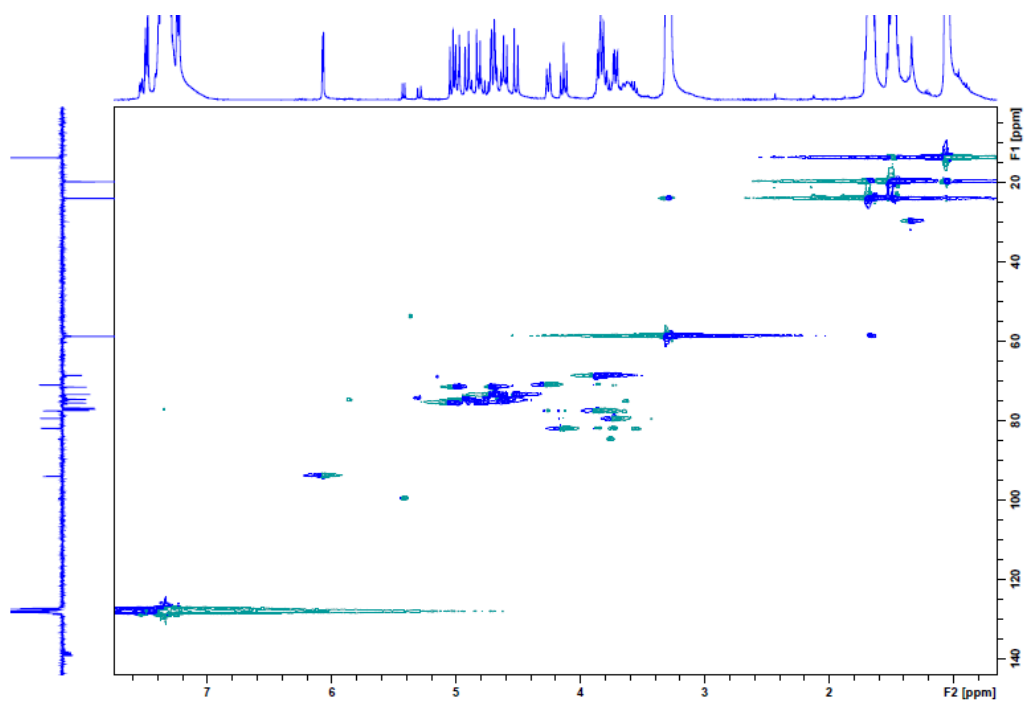

Fig. S5  $^1\text{H}$  NMR spectrum of **2b** in  $\text{CDCl}_3$  (400 MHz)

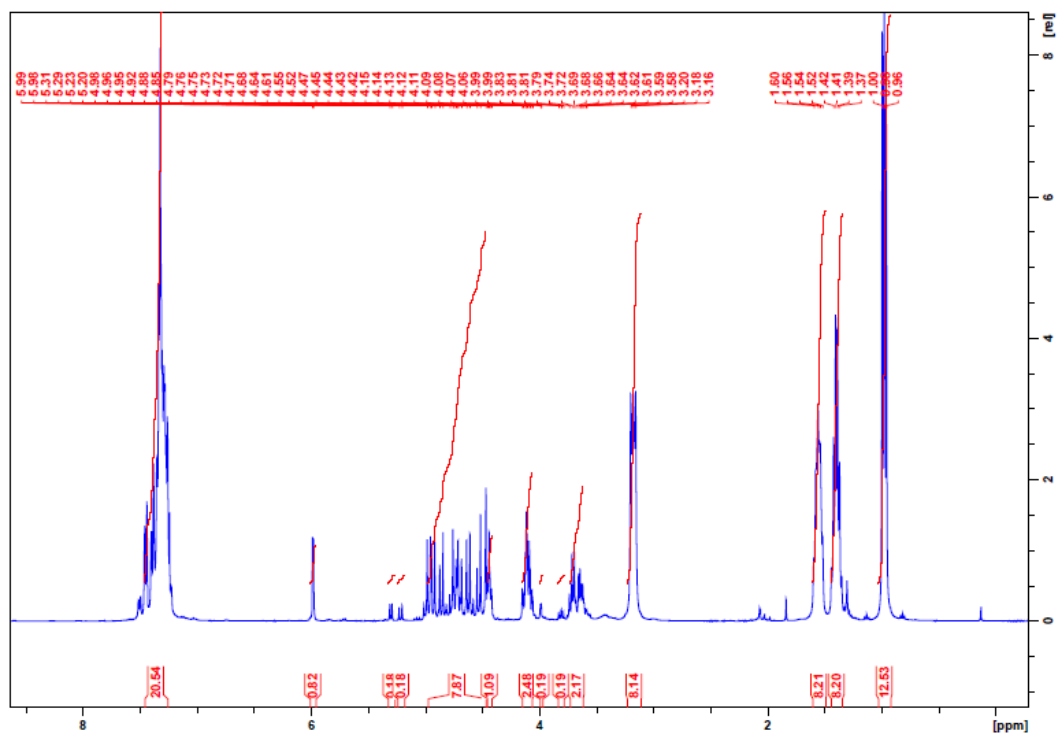

Fig. S6 APT NMR spectrum of **2b** in  $\text{CDCl}_3$  (101 MHz)

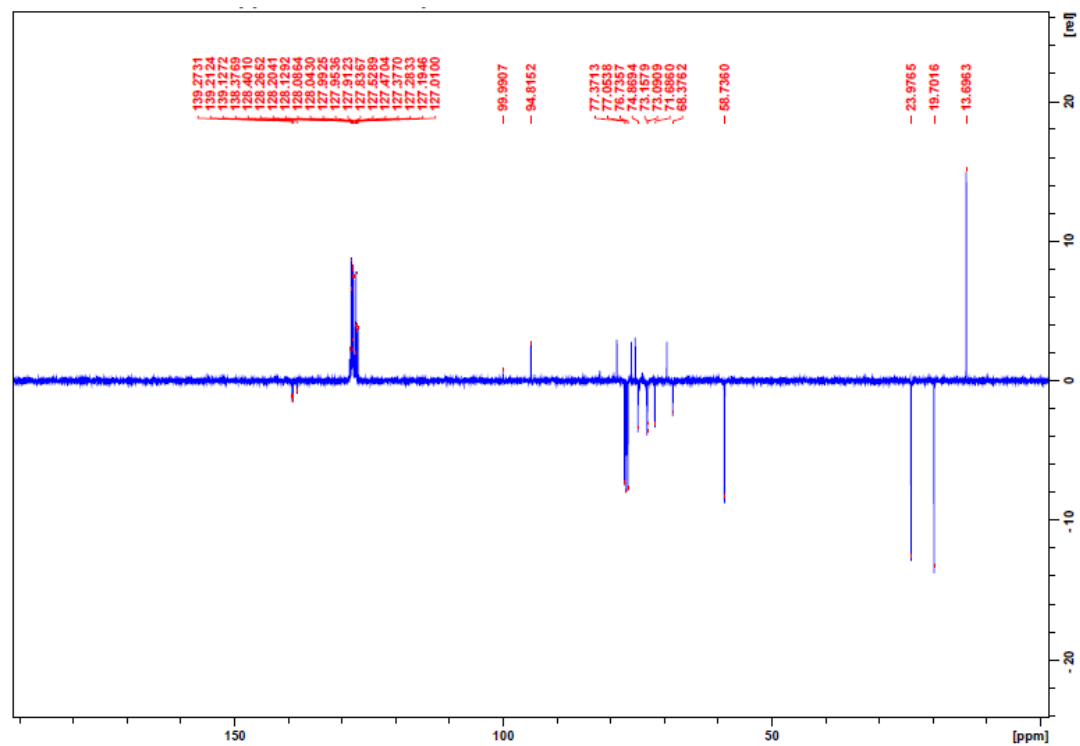

**Fig. S7** Cosy NMR spectrum of **2b** in CDCl<sub>3</sub> (400 MHz)

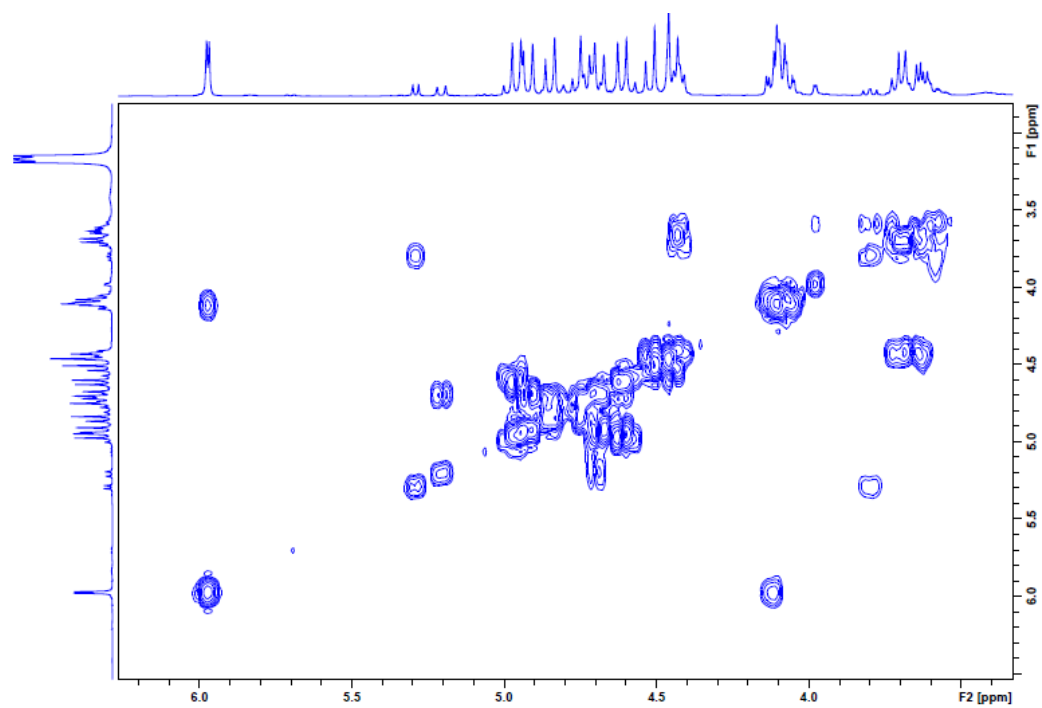

**Fig. S8** HSQC NMR spectrum of **2b** in CDCl<sub>3</sub>

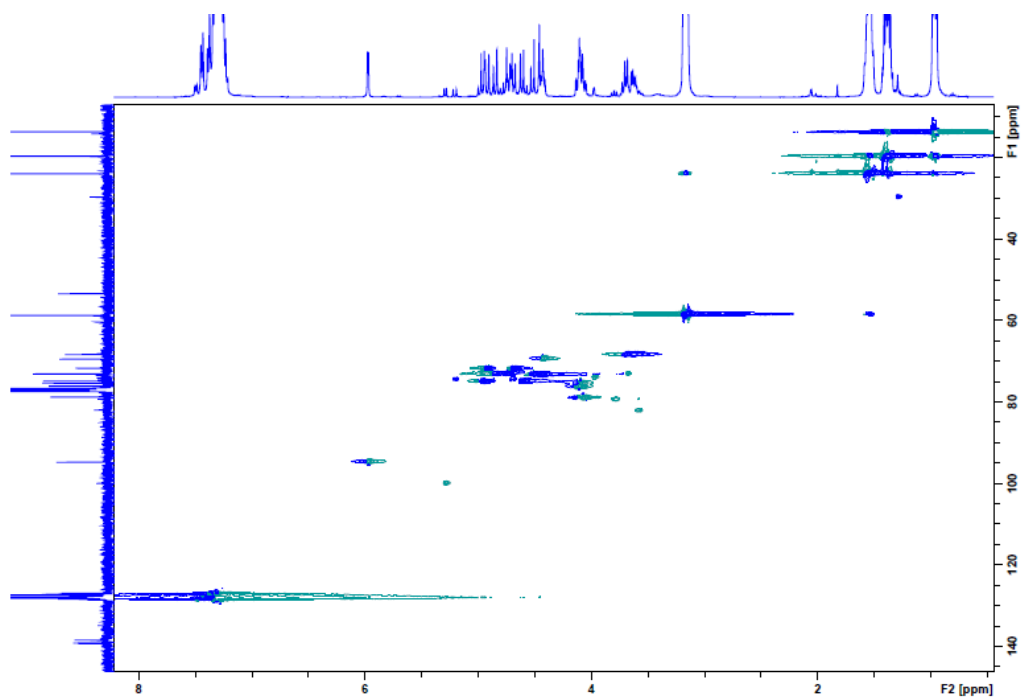



Fig. S9  $^1\text{H}$  NMR spectrum of **2c** in  $\text{CDCl}_3$  (400 MHz)

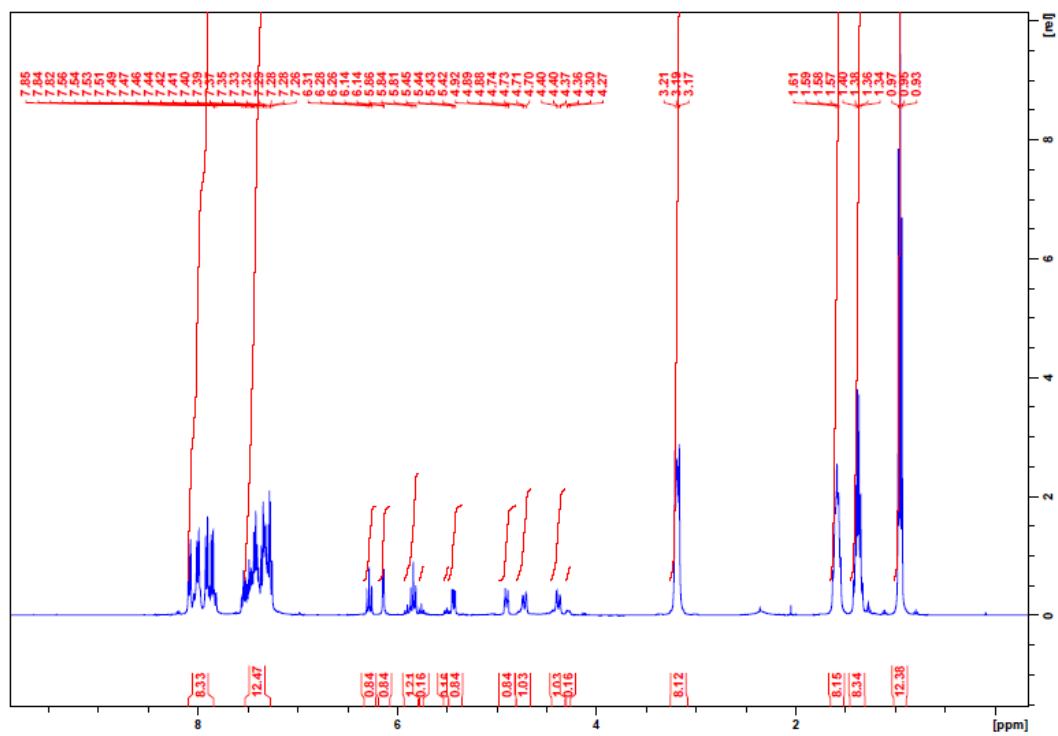

Fig. S10 Apt NMR spectrum of **2c** in  $\text{CDCl}_3$  (101 MHz)

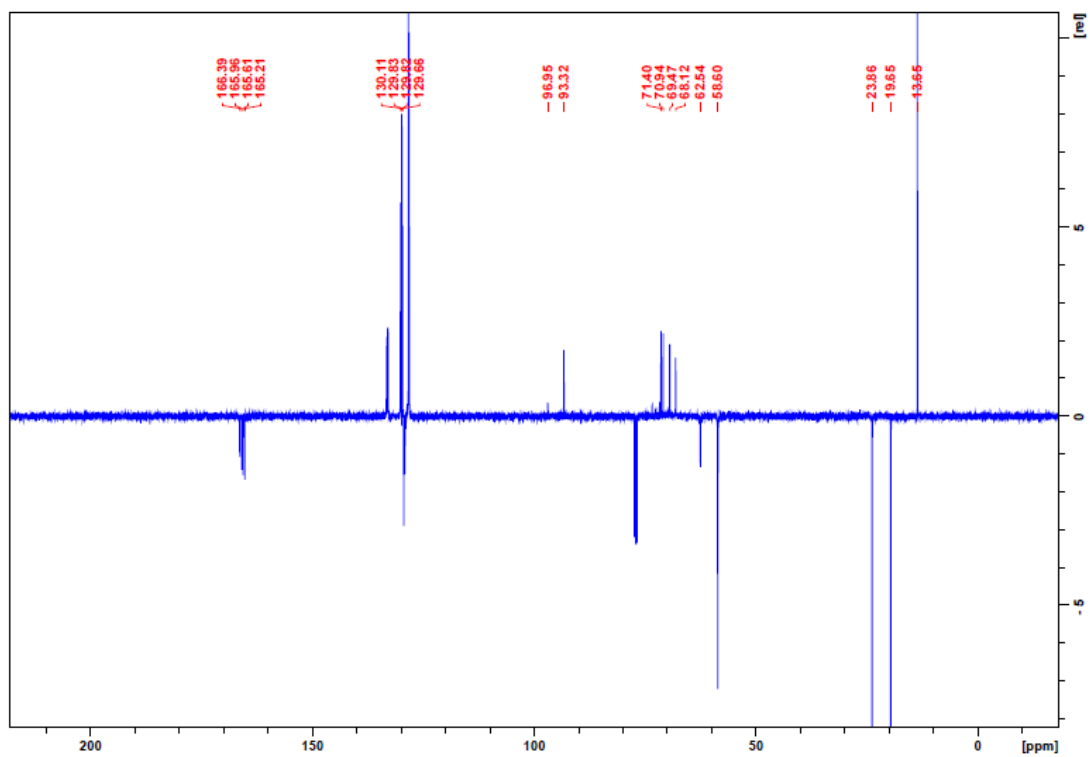

**Fig. S11** Cosy NMR spectrum of **2c** in CDCl<sub>3</sub> (400 MHz)

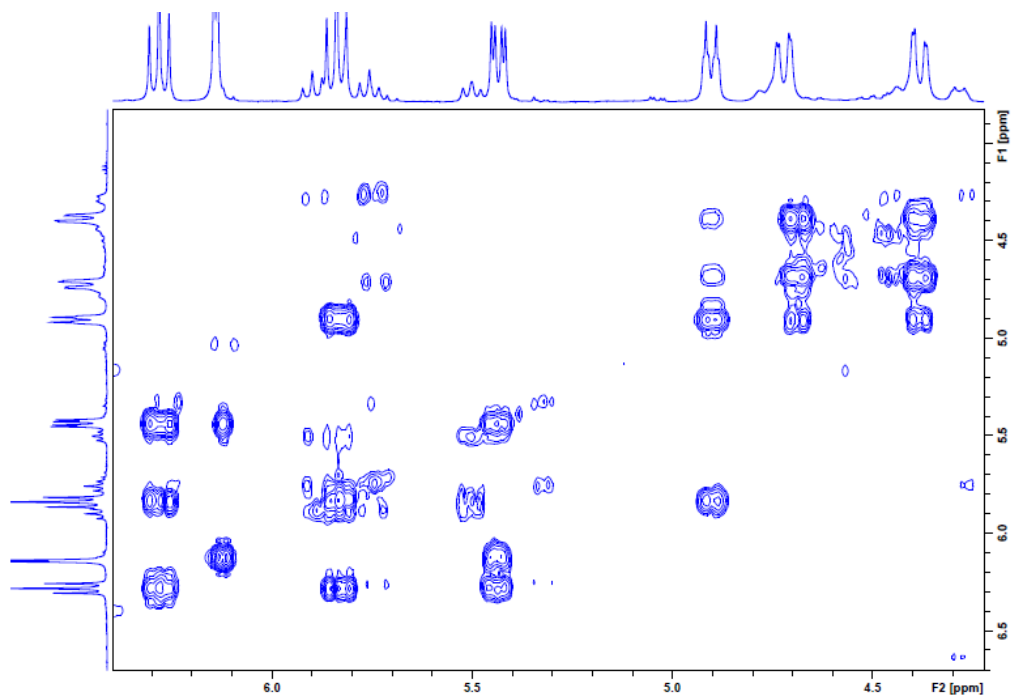

**Fig. S12** HSQC NMR spectrum of **2c** in CDCl<sub>3</sub>

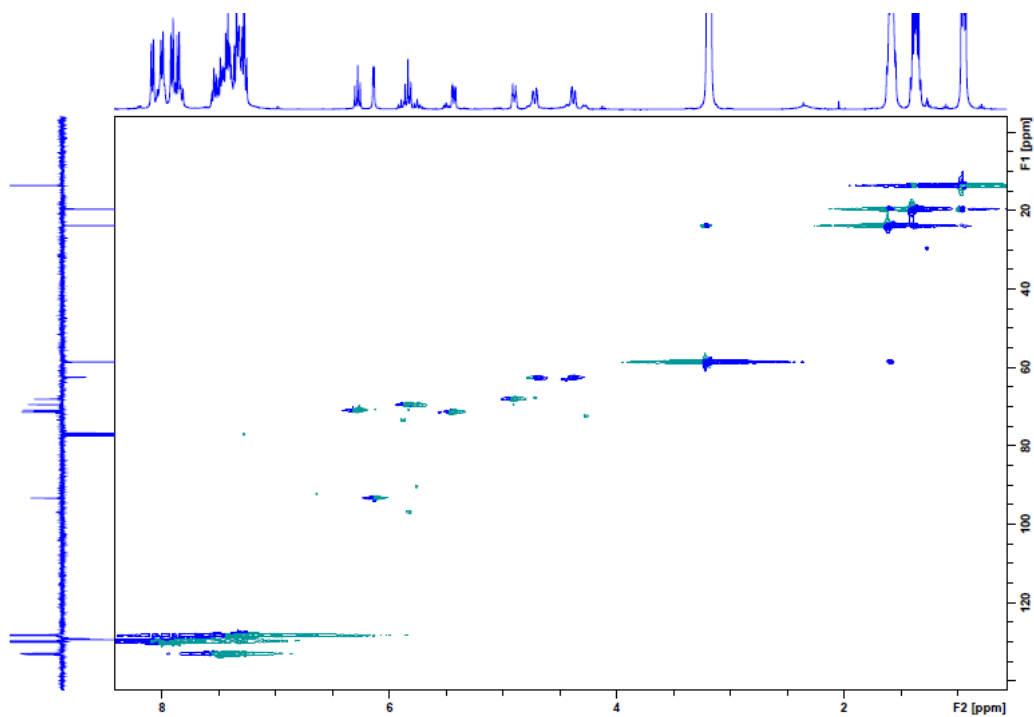

Fig. S13  $^1\text{H}$  NMR spectrum of **4c** in  $\text{CDCl}_3$

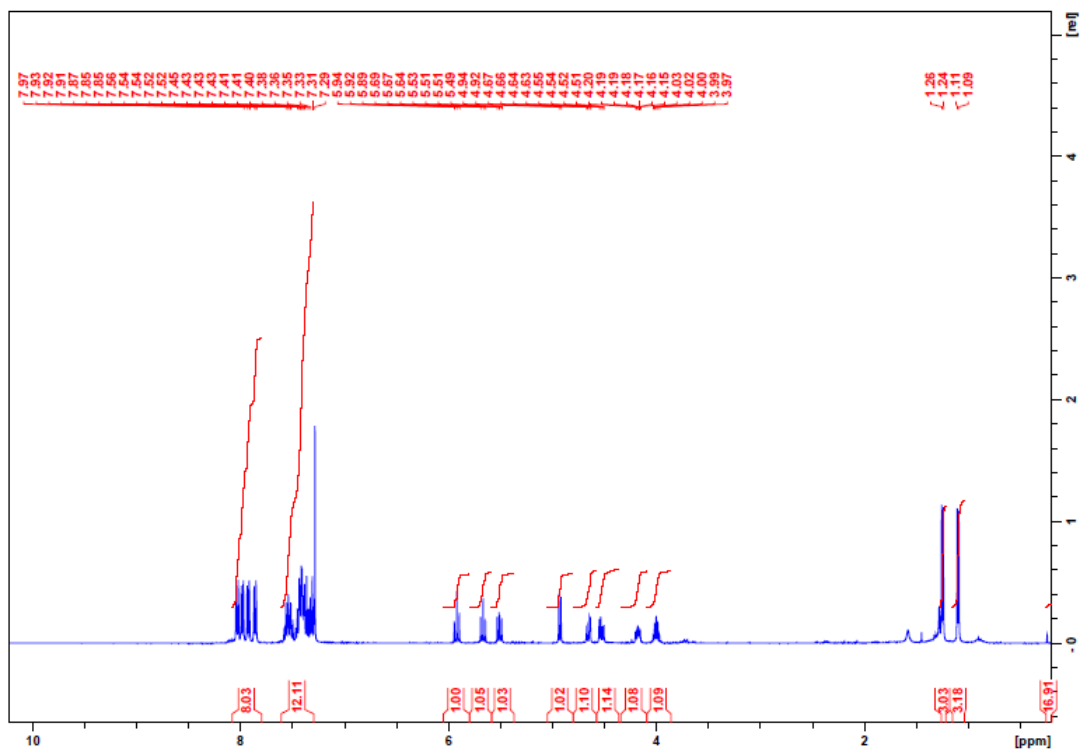

Fig. S14  $^{13}\text{C}$  NMR spectrum of **4c** in  $\text{CDCl}_3$

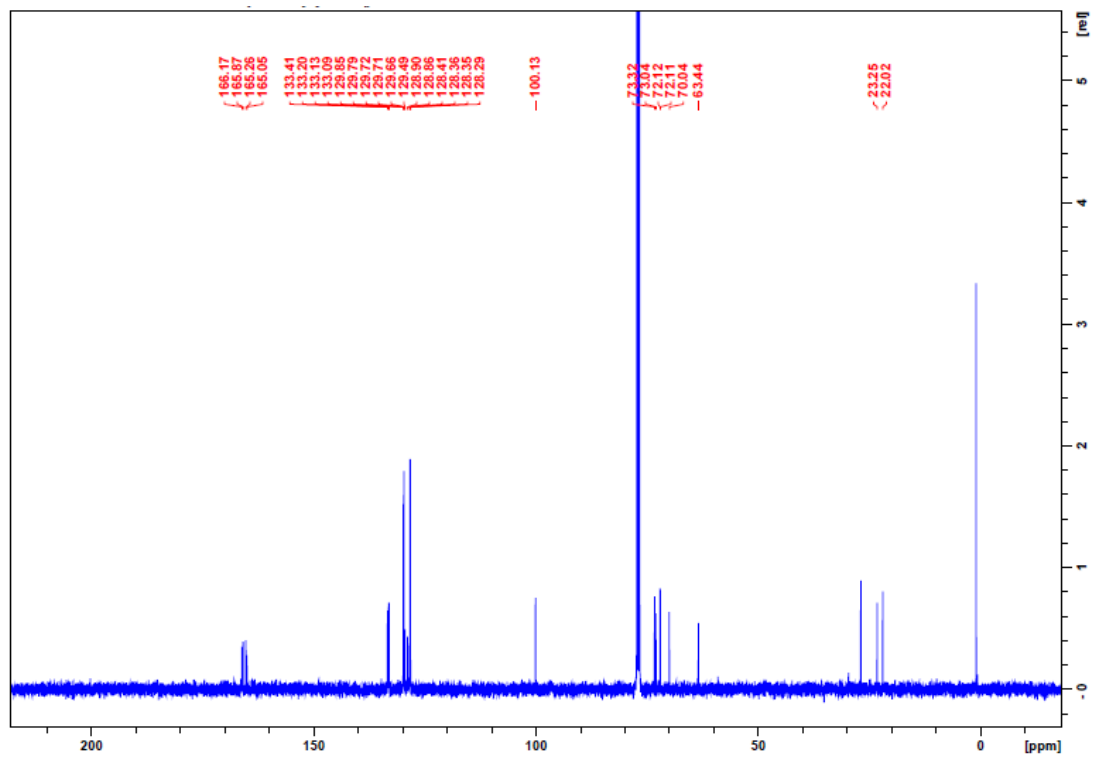

Fig. S15 <sup>1</sup>H NMR spectrum of **4a** in CDCl<sub>3</sub> (400 MHz)

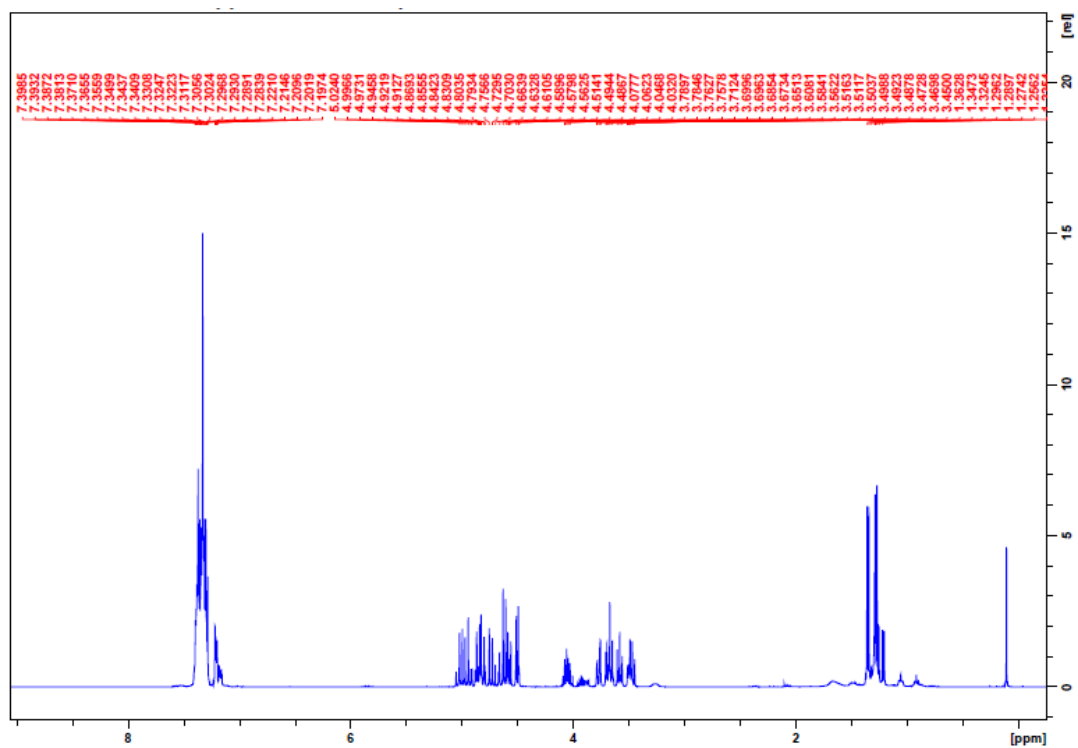

Fig. S16 <sup>1</sup>H NMR spectrum of **6a** in CDCl<sub>3</sub> (400 MHz)

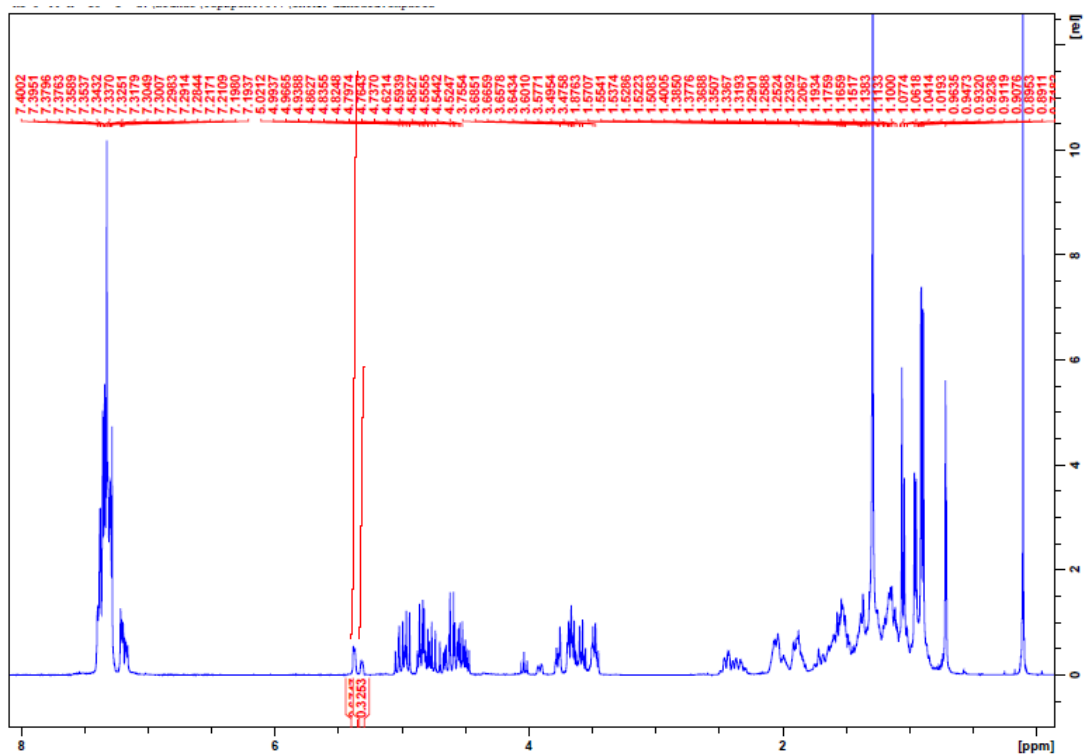

Fig. S17  $^1\text{H}$  NMR spectrum of **8a** in  $\text{CDCl}_3$  (400 MHz)

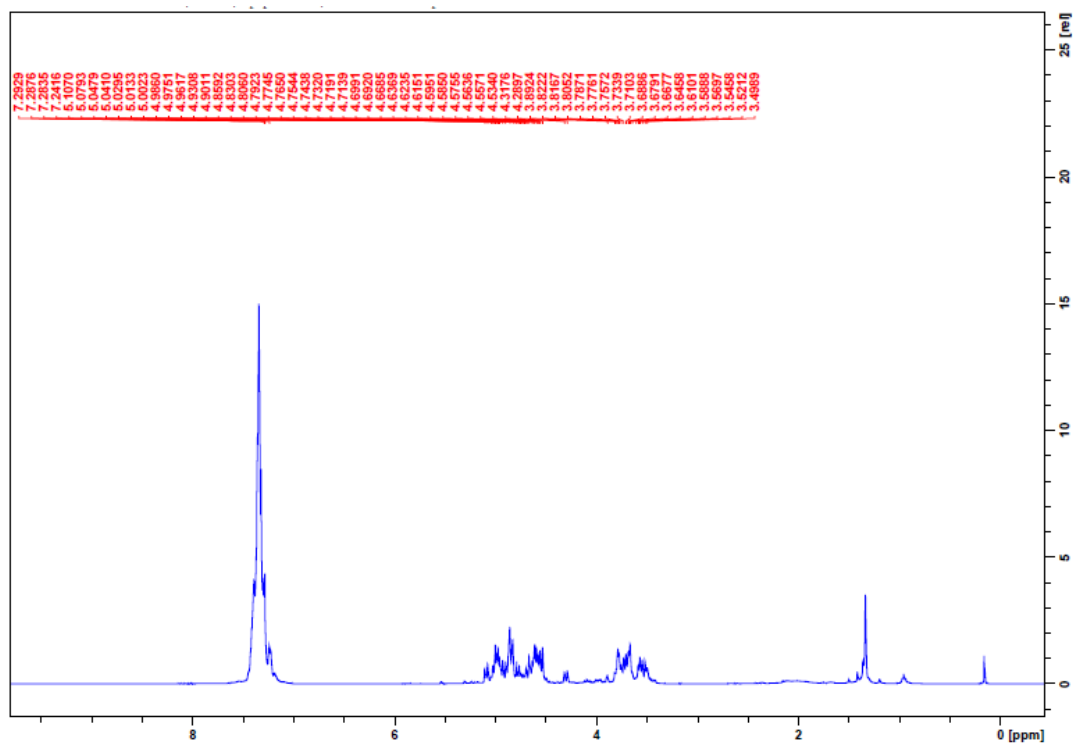

Fig. S18  $^1\text{H}$  NMR spectrum of **10a** in  $\text{CDCl}_3$  (400 MHz)

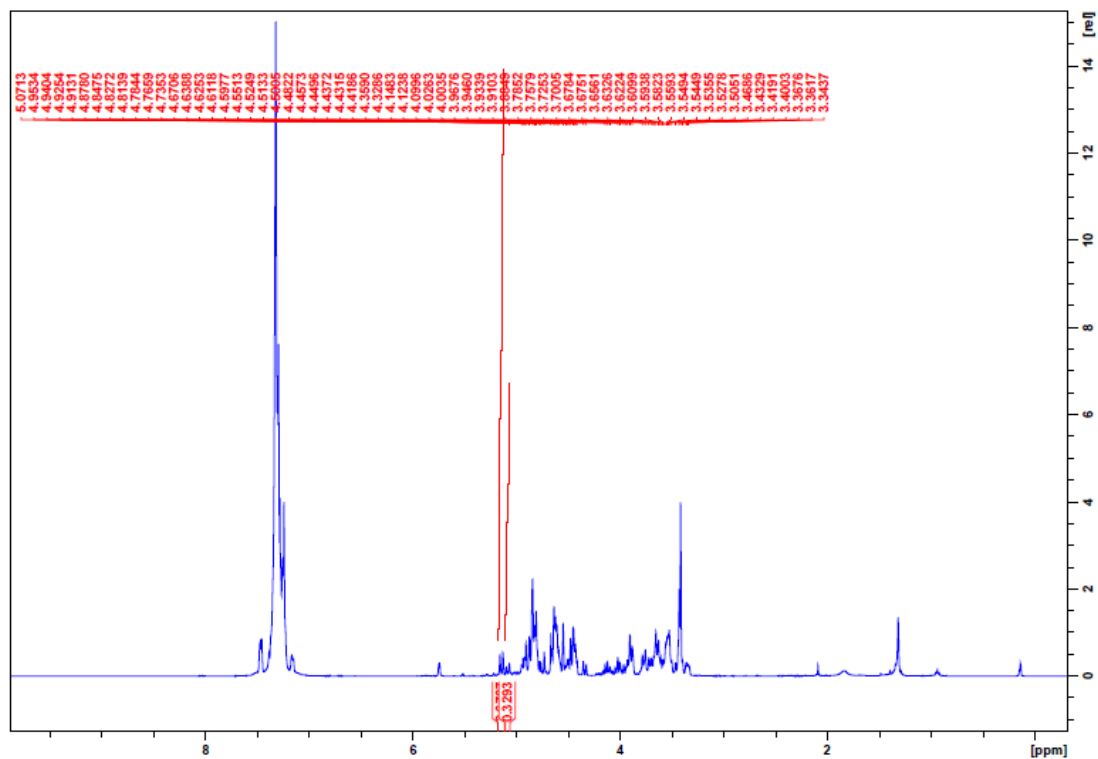

Fig. S19  $^1\text{H}$  NMR spectrum of **4b** in  $\text{CDCl}_3$  (400 MHz)

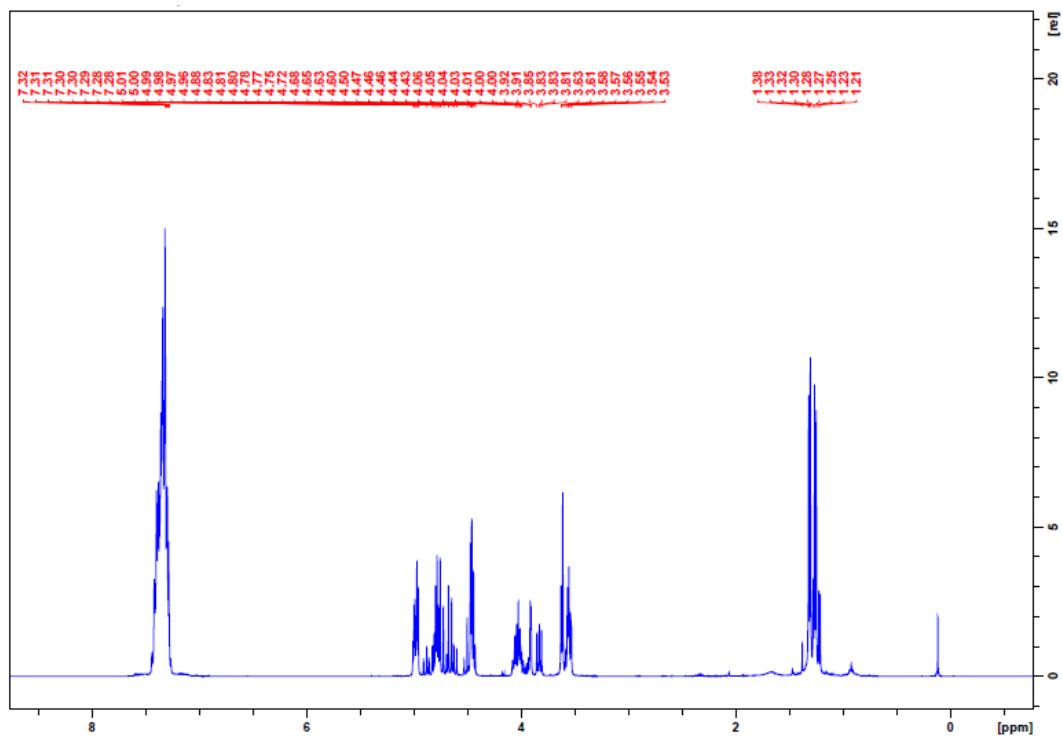

Fig. S20  $^1\text{H}$  NMR spectrum of **6b** in  $\text{CDCl}_3$  (400 MHz)

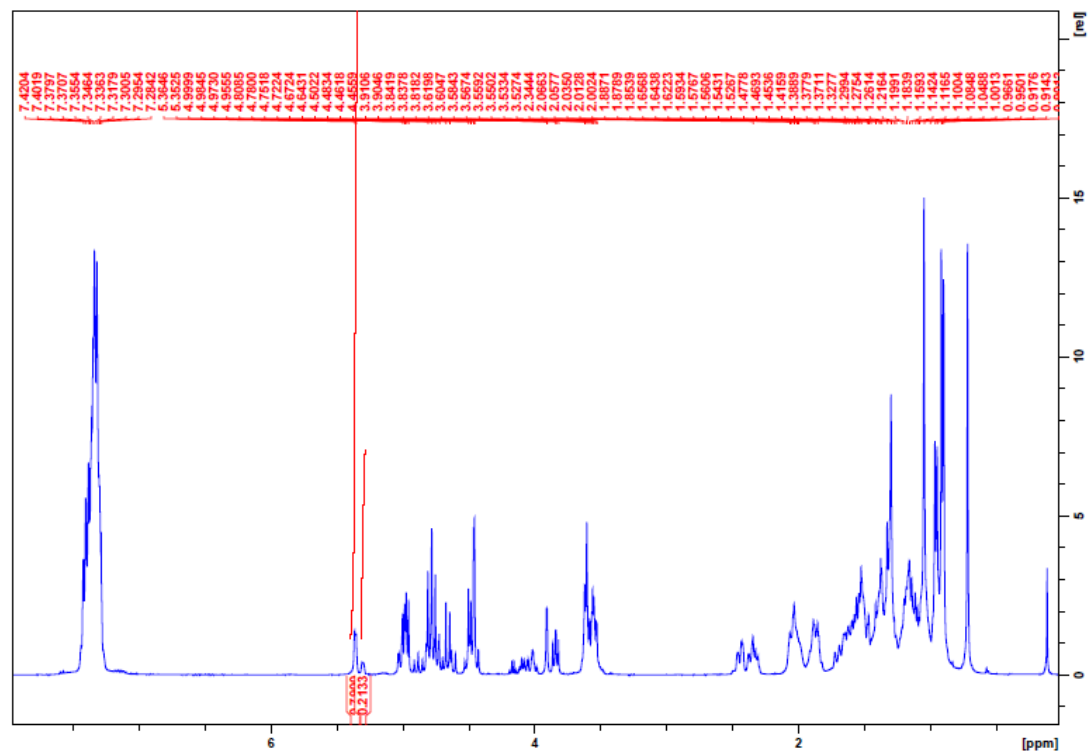

Fig. S21  $^1\text{H}$  NMR spectrum of **8b** in  $\text{CDCl}_3$  (400 MHz)

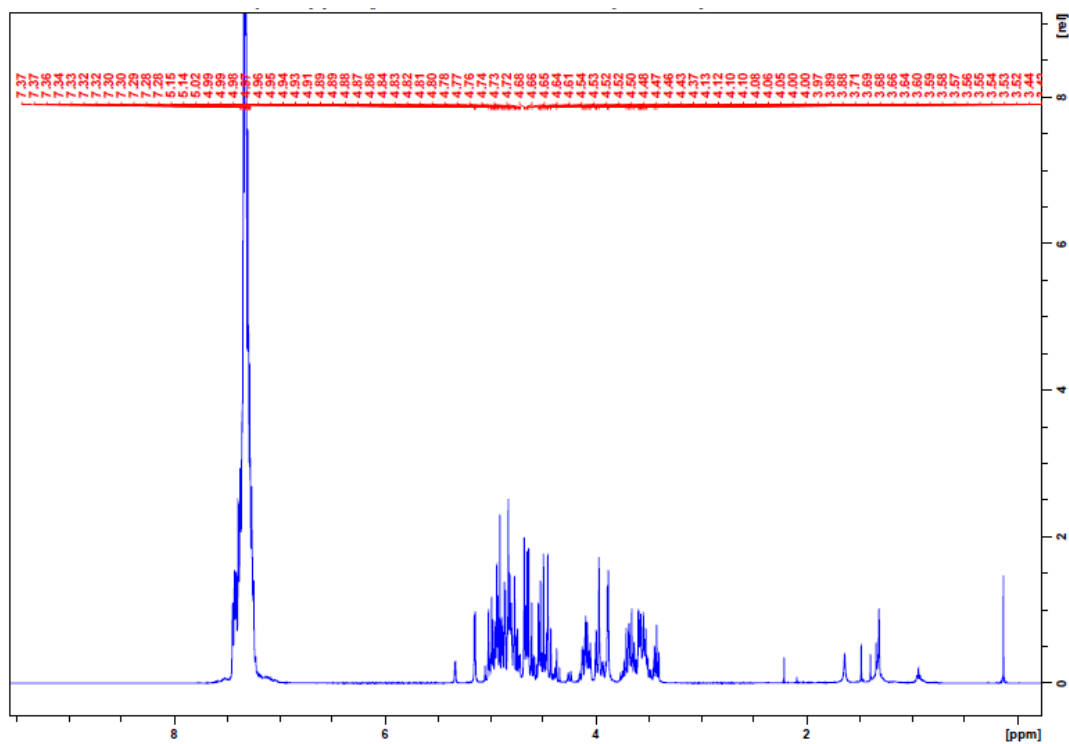

Fig. S22  $^1\text{H}$  NMR spectrum of **10b** in  $\text{CDCl}_3$  (400 MHz)

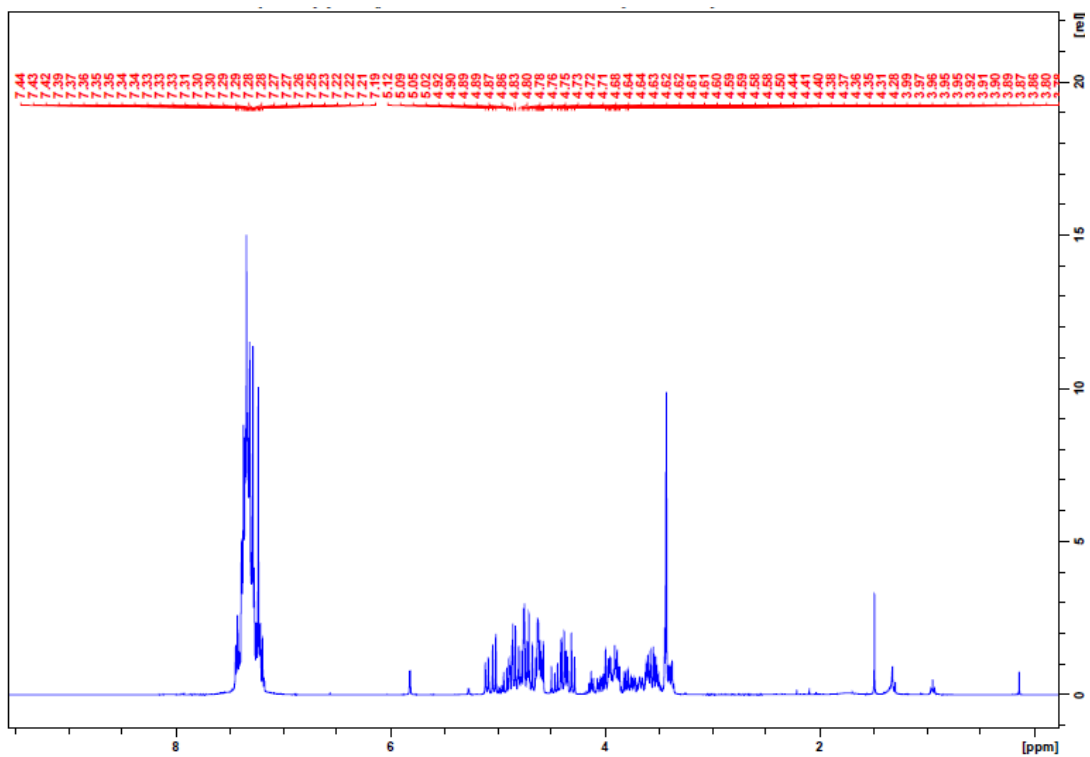

Supplement: d1ob00603g1.pdf [file d1ob00603g1.pdf]
